# Supplementary material for: Designer Adaptor Proteins for Functional Conversion of Peptides to Small-Molecule Ligands toward In-Cell Catalytic Protein Modification
Source: PubMed Central journal article supplement (PMC10683481; doi:10.1021/acscentsci.3c00930), 2023-10-25
Supplement: oc3c00930_si_001.pdf [file oc3c00930_si_001.pdf]

Supporting Information for

**Designer adaptor proteins for functional conversion of peptides to small-molecule ligands toward in-cell catalytic protein modification**

Akiko Fujimura<sup>1</sup>, Hisashi Ishida<sup>2</sup>, Tamiko Nozaki<sup>1</sup>, Shuhei Terada<sup>1</sup>, Yuto Azumaya<sup>1</sup>, Tadashi Ishiguro<sup>1</sup>, Yugo R. Kamimura<sup>1</sup>, Tomoya Kujirai<sup>3</sup>, Hitoshi Kurumizaka<sup>3</sup>, Hidetoshi Kono<sup>2</sup>, Kenzo Yamatsugu<sup>1</sup>, Shigehiro A. Kawashima<sup>1,\*</sup>, & Motomu Kanai<sup>1,\*</sup>

<sup>1</sup>Graduate School of Pharmaceutical Sciences, The University of Tokyo, Tokyo 113-0033, Japan, <sup>2</sup>Institute for Quantum Life Science, National Institutes for Quantum Science and Technology, Kyoto, 619-0215, Japan, <sup>3</sup>Institute for Quantitative Biosciences, The University of Tokyo, Tokyo 113-0032, Japan

\*Corresponding Authors:

Motomu Kanai

kanai@mol.f.u-tokyo.ac.jp

Shigehiro A. Kawashima

skawashima@mol.f.u-tokyo.ac.jp

## Table of contents

|                     |     |
|---------------------|-----|
| Synthesis           | S3  |
| Expression plasmids | S5  |
| Antibodies          | S9  |
| References          | S10 |
| Figure S1-S4        | S11 |
| Table S1-S8         | S17 |

## General

NMR spectra were recorded on JEOL ECX500 spectrometer, operating at 500 MHz for  $^1\text{H}$  NMR or JEOL ECS400 spectrometer, operating at 400 MHz for  $^1\text{H}$  NMR. Chemical shifts were reported in ppm on the  $\delta$  scale relative to residual  $\text{CD}_3\text{OD}$  ( $\delta = 3.31$  for  $^1\text{H}$  NMR) and  $(\text{CD}_3)_2\text{CO}$  ( $\delta = 2.04$  for  $^1\text{H}$  NMR) as an internal reference, respectively. Preparative HPLC was conducted by using a JASCO HPLC system equipped with a UV-2075 spectrometer, PU-2086 pumps, a DG-2080-53 degasser, and an MX-2080-32 mixer. High resolution mass spectra were recorded using a Bruker microTOF ESI-TOF mass spectrometer.

## Synthesis of TMP-conjugated TAMRA

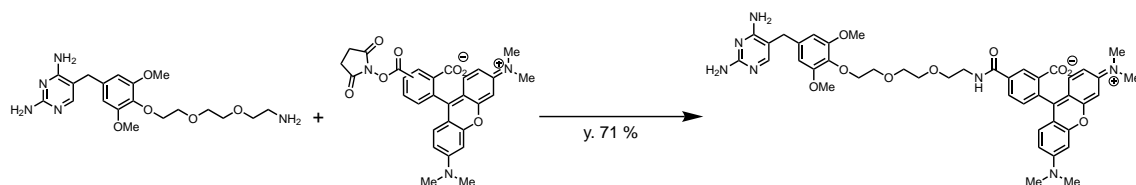

To a stirred solution of 5-(4-(2-(2-(2-aminoethoxy)ethoxy)ethoxy)-3,5-dimethoxybenzyl)pyrimidine-2,4-diamine<sup>1</sup> (2.7 mg, 6.63  $\mu\text{mol}$ ) and NHS-tetramethylrhodamine (5,6-isomer, 4.2 mg, 87.96  $\mu\text{mol}$ ) in DMF (200  $\mu\text{L}$ ), 0.1 M  $\text{NaHCO}_3$  aq. was added. The mixture was stirred at room temperature. After 25 min, 50  $\mu\text{L}$   $\text{H}_2\text{O}$  was added and the mixture was aged for a further 90 min. The mixture was concentrated and purified with preparative HPLC (2 % acetonitrile for 5 min, followed by a linear gradient of 2-100 % acetonitrile over 40 min in 0.1% TFA aqueous solution, YMC-Triart C18, 254 nm) to afford TMP-conjugated TAMRA (5-isomer was separated., 3.87 mg, 4.72  $\mu\text{mol}$ , 71 % yield) as red powder.  $^1\text{H}$  NMR ( $\text{CD}_3\text{OD}$ , 500 MHz)  $\delta$  8.74 (d,  $J = 1.7$  Hz, 1H), 8.24 (dd,  $J = 1.7$  Hz,  $J = 7.5$  Hz, 1H), 7.48 (d,  $J = 8.0$  Hz, 1H), 7.11 (m, 3H), 7.02 (dd,  $J = 2.3$  Hz,  $J = 9.2$  Hz, 2H), 6.96 (d,  $J = 2.9$  Hz, 2H), 6.53 (s, 2H), 4.07 (m, 2H), 3.76-3.72 (m, 16H), 3.61 (s, 1H), (12H from tetramethyl moiety seemed to be overlapped with  $\text{CHD}_2\text{OD}$ .);

ESI-HRMS  $m/z$  calcd for  $\text{C}_{44}\text{H}_{49}\text{N}_7\text{O}_9$   $[\text{M}+\text{H}]^+$ : 820.3665; Found 820.3648

## Synthesis of 6

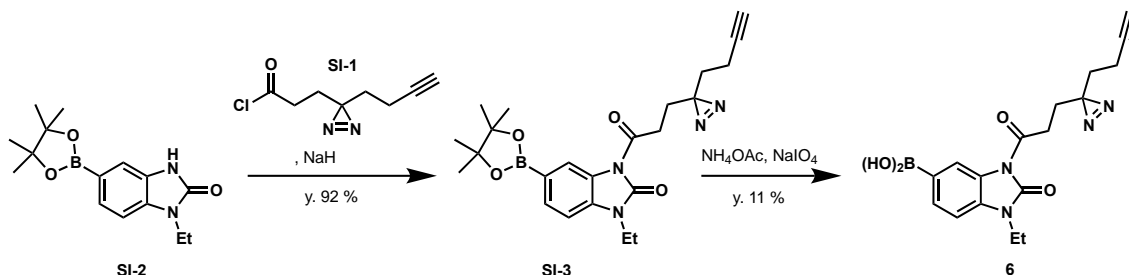

To a stirred solution of **SI-1** (9.5 mg, 57  $\mu$ mol, 4.7 eq)<sup>2</sup> in 300  $\mu$ L CH<sub>2</sub>Cl<sub>2</sub> was charged 0.2  $\mu$ L DMF followed by oxalyl chloride (7.4  $\mu$ L, 85  $\mu$ mol, 7.0 eq). After 45 min, the reaction was concentrated on the rotovap and co-evaporated with 100  $\mu$ L CH<sub>2</sub>Cl<sub>2</sub>.

To a stirred 0.2 M solution of **SI-2** (3.5 mg, 12  $\mu$ mol)<sup>3</sup> in DMF, was charged NaH (55% suspension, 0.64 mg, 15  $\mu$ mol, 1.2 eq). After 5 min, the crude acid chloride was charged as a solution in 50  $\mu$ L CH<sub>2</sub>Cl<sub>2</sub>. After 15 min, the reaction was quenched to a stirred mixture of 2 mL EtOAc and 1 mL pH 4 buffer. The aqueous material was discarded, and the organic material was washed twice with brine, dried (MgSO<sub>4</sub>), filtered, and concentrated on the rotovap. The crude material was purified with preparative HPLC (30 % acetonitrile for 5 min, followed by a linear gradient of 30-100 % acetonitrile over 70 min in 0.1% TFA aqueous solution, YMC-Triart C18, 254 nm) to afford the intermediate boronic ester **SI-3** (5.3 mg, 11  $\mu$ mol, 92% yield) as a white solid.

To a stirred suspension of the intermediate boronic ester **SI-3** (3.2 mg, 7.3  $\mu$ mol) in 200  $\mu$ L 2 : 1 v/v acetone : H<sub>2</sub>O was charged NH<sub>4</sub>OAc (2M solution in H<sub>2</sub>O, 7.3  $\mu$ L, 15  $\mu$ mol, 2 eq) followed by NaIO<sub>4</sub> (4.7 mg, 22  $\mu$ mol, 3 eq), and the mixture aged for overnight at 35 °C. Most of the acetone was removed on the rotovap. The mixture was extracted with 1 mL EtOAc and 1 mL H<sub>2</sub>O and the aqueous material was discarded. The organic material was washed with brine, dried (MgSO<sub>4</sub>), and concentrated on the rotovap. Purification by preparative HPLC (10 % acetonitrile for 5 min, followed by a linear gradient of 10-80 % acetonitrile over 100 min in 0.1% TFA aqueous solution, YMC-Triart PFP, 254 nm) afforded **6** (0.28 mg, 0.79  $\mu$ mol, 11% yield) as a white solid.

<sup>1</sup>H NMR ((CH<sub>3</sub>)<sub>2</sub>CO, 400 MHz)  $\delta$  8.62 (s, 1H), 7.99 (bs, 1H), 7.80 (d, *J* = 7.6 Hz, 1H), 7.17 (d, *J* = 7.6 Hz, 1H), 3.93 (q, *J* = 6.3 Hz, 2H), 3.05 (t, *J* = 7.6 Hz, 2H), 2.39 (br, 1H), 1.73 (t, *J* = 7.2 Hz, 2H), 1.30 (t, *J* = 7.2 Hz, 7H);

ESI-HRMS *m/z* calcd for C<sub>17</sub>H<sub>19</sub>BN<sub>4</sub>O<sub>4</sub> [M+Na]<sup>+</sup>: 377.1392; Found 377.1398

## Expression plasmids

Plasmids were constructed from pGEX-6P-2-eDHFR-GFP plasmid<sup>1</sup> by ligating DNA fragments using DNA Ligation kit (TaKaRa) or site-directed mutagenesis using Prime STAR MAX (TaKaRa). All plasmids used in this paper are listed in Table S1. List of protein sequences is shown below. **Texts in red** indicate the affinity tags that were cleaved during purification.

> **GST**-hMDM2(17-125) from pGEX-6P-2-hMDM2(17-125)

**MSPILGYWKIKGLVQPTRLLEYLEEKYEEHLYERDEGDKWRNKKFELGLEFP  
NLPYYIDGDVKLTQSMAIIRYIADKHNMLGGCPKERAEISMLEGAVLDIRYGVSR  
IAYSKDFETLKVDFLSKLPEMLKMFEDRLCHKTYLNGDHVTHPDFMLYDALDV  
VLYMDPMCLDAFPKLVCFKKRIEAIQIDKYLKSSKYAWPLQGQWQATFGGGD  
HPPKSDLEVLFFQGPLGSSQIPASEQETLVRPKPLLLKLLKSVGAKDITYTMKEV  
LFYLGQYIMTKRLYDEKQQHIVYCSNDLLGDLFGVPSFSVKEHRKIYTMIRNL  
VVVNQQESSDSGTSVSEN**

> **GST**-eDHFR(**K32R**) from pGEX-6P-2-eDHFR(K32R)

**MSPILGYWKIKGLVQPTRLLEYLEEKYEEHLYERDEGDKWRNKKFELGLEFP  
NLPYYIDGDVKLTQSMAIIRYIADKHNMLGGCPKERAEISMLEGAVLDIRYGVSR  
IAYSKDFETLKVDFLSKLPEMLKMFEDRLCHKTYLNGDHVTHPDFMLYDALDV  
VLYMDPMCLDAFPKLVCFKKRIEAIQIDKYLKSSKYAWPLQGQWQATFGGGD  
HPPKSDLEVLFFQGPLGSMISLIAALAVDRVIGMENAMPWNLPA DLAWF**GR**NTL  
NKPVIMGRHTWESIGRPLPGRKNIILSSQPGTDDRVTWVKSVDEAIAACGDVP  
EIMVIGGGRVYEQFLPKAQKLYLTHIDAEVEGDTHFPDYEPDDWESVFSEFHD  
ADAQNSHSYCFEILERR**

> **GST**-eDHFR(**K32R**)-**MBP1** from pGEX-6P-2-eDHFR(K32R)-MBP1

**MSPILGYWKIKGLVQPTRLLEYLEEKYEEHLYERDEGDKWRNKKFELGLEFP  
NLPYYIDGDVKLTQSMAIIRYIADKHNMLGGCPKERAEISMLEGAVLDIRYGVSR  
IAYSKDFETLKVDFLSKLPEMLKMFEDRLCHKTYLNGDHVTHPDFMLYDALDV  
VLYMDPMCLDAFPKLVCFKKRIEAIQIDKYLKSSKYAWPLQGQWQATFGGGD  
HPPKSDLEVLFFQGPLGSMISLIAALAVDRVIGMENAMPWNLPA DLAWF**GR**NTL  
NKPVIMGRHTWESIGRPLPGRKNIILSSQPGTDDRVTWVKSVDEAIAACGDVP  
EIMVIGGGRVYEQFLPKAQKLYLTHIDAEVEGDTHFPDYEPDDWESVFSEFHD  
ADAQNSHSYCFEILERR**ETFEHWWSQLLS****

> **GST**-**MBP1**-eDHFR(**K32R**) from pGEX-6P-2-MBP1-eDHFR(K32R)

MSPILGYWKIKGLVQPTRLLEYLEEKYEEHLYERDEGDKWRNKKFELGLEFP  
NLPYYIDGDVKLTQSMAIIRYIADKHNMLGGCPKERAIEISMLEGAVLDIRYGVS  
IAYSKDFETLKVDFLSKLPEMLKMFEDRLCHKTYLNGDHVTHPDFMLYDALDV  
VLYMDPMCLDAFPKLVCFKKRIEAIQIDKYLKSSKYAWPLQGQWQATFGGGD  
HPPKSDLEVLFFQGPLGSETFEHWWSQLLSISLIAALAVDRVIGMENAMPWNLP  
ADLAWFRRNTLNKPVIMGRHTWESIGRPLPGRKNIILSSQPGTDDRVTWVKSV  
DEAIAACGDVPEIMVIGGGRVYEQFLPKAQKLYLTHIDAEVEGDTHFPDYEPDD  
WESVFSEFHDADAQNSHSYCFEILERR

> GST-PLIED-M1(K32R) from pGEX-6P-2-PLIED-M1(K32R)

MSPILGYWKIKGLVQPTRLLEYLEEKYEEHLYERDEGDKWRNKKFELGLEFP  
NLPYYIDGDVKLTQSMAIIRYIADKHNMLGGCPKERAIEISMLEGAVLDIRYGVS  
IAYSKDFETLKVDFLSKLPEMLKMFEDRLCHKTYLNGDHVTHPDFMLYDALDV  
VLYMDPMCLDAFPKLVCFKKRIEAIQIDKYLKSSKYAWPLQGQWQATFGGGD  
HPPKSDLEVLFFQGPLGSMISLIAALAVDRVIGMENAMPWNLPADLAWFRRNTL  
NKPVIMGRHTWESIGGGTFEHWWSQLLSGGGRKNIILSSQPGTDDRVTWVK  
SVDEAIAACGDVPEIMVIGGGRVYEQFLPKAQKLYLTHIDAEVEGDTHFPDYEP  
DDWESVFSEFHDADAQNSHSYCFEILERR

> GST-PLIED-M2(K32R) from pGEX-6P-2-PLIED-M2(K32R)

MSPILGYWKIKGLVQPTRLLEYLEEKYEEHLYERDEGDKWRNKKFELGLEFP  
NLPYYIDGDVKLTQSMAIIRYIADKHNMLGGCPKERAIEISMLEGAVLDIRYGVS  
IAYSKDFETLKVDFLSKLPEMLKMFEDRLCHKTYLNGDHVTHPDFMLYDALDV  
VLYMDPMCLDAFPKLVCFKKRIEAIQIDKYLKSSKYAWPLQGQWQATFGGGD  
HPPKSDLEVLFFQGPLGSMISLIAALAVDRVIGMENAMPWNLPADLAWFRRNTL  
NKPVIMGRHTWESIGGGRFMDYWEGLGGGRKNIILSSQPGTDDRVTWVKSV  
DEAIAACGDVPEIMVIGGGRVYEQFLPKAQKLYLTHIDAEVEGDTHFPDYEPDD  
WESVFSEFHDADAQNSHSYCFEILERR

> GST-PLIED-M3(K32R) from pGEX-6P-2-PLIED-M3(K32R)

MSPILGYWKIKGLVQPTRLLEYLEEKYEEHLYERDEGDKWRNKKFELGLEFP  
NLPYYIDGDVKLTQSMAIIRYIADKHNMLGGCPKERAIEISMLEGAVLDIRYGVS  
IAYSKDFETLKVDFLSKLPEMLKMFEDRLCHKTYLNGDHVTHPDFMLYDALDV  
VLYMDPMCLDAFPKLVCFKKRIEAIQIDKYLKSSKYAWPLQGQWQATFGGGD  
HPPKSDLEVLFFQGPLGSMISLIAALAVDRVIGMENAMPWNLPADLAWFRRNTL  
NKPVIMGRHTWESIGGGTSAEYWNLLGGGRKNIILSSQPGTDDRVTWVKSV

DEAIAACGDVPEIMVIGGGRVYEQFLPKAQKLYLTHIDAEVEGDTHFPDYEPDD  
WESVFSEFHDADAQNSHSYCFEILERR

> GST-LANA-eDHFR(K32R) from pGEX-6P-2-LANA-eDHFR(K32R)

MSPILGYWKIKGLVQPTRLLEYLEEKYEEHLYERDEGDKWRNKKFELGLEFP  
NLPYYIDGDVKLTQSMAIIRYIADKHNMLGGCPKERAIEISMLEGAVLDIRYGVS  
IAYSKDFETLKVDFLSKLPEMLKMFEDRLCHKTYLNGDHVTHPDFMLYDALDV  
VLYMDPMCLDAFPKLVCFKKRIEAIQIDKYLKSSKYAWPLQGQWQATFGGGD  
HPPKSDLEVLFFQGPLGSMGMRLRSGRSTGISLIAALAVDRVIGMENAMPWNLP  
ADLAWFRNTLNKPVIMGRHTWESIGRPLPGRKNIILSSQPGTDDRVTWVKSV  
DEAIAACGDVPEIMVIGGGRVYEQFLPKAQKLYLTHIDAEVEGDTHFPDYEPDD  
WESVFSEFHDADAQNSHSYCFEILERR

> GST-eDHFR(K32R)-LANA from pGEX-6P-2-eDHFR(K32R)-LANA

MSPILGYWKIKGLVQPTRLLEYLEEKYEEHLYERDEGDKWRNKKFELGLEFP  
NLPYYIDGDVKLTQSMAIIRYIADKHNMLGGCPKERAIEISMLEGAVLDIRYGVS  
IAYSKDFETLKVDFLSKLPEMLKMFEDRLCHKTYLNGDHVTHPDFMLYDALDV  
VLYMDPMCLDAFPKLVCFKKRIEAIQIDKYLKSSKYAWPLQGQWQATFGGGD  
HPPKSDLEVLFFQGPLGSMISLIAALAVDRVIGMENAMPWNLPADLAWFRNTLN  
KPVIMGRHTWESIGRPLPGRKNIILSSQPGTDDRVTWVKSVDEAIAACGDVP  
EIMVIGGGRVYEQFLPKAQKLYLTHIDAEVEGDTHFPDYEPDDWESVFSEFHD  
ADAQNSHSYCFEILERRGMRLRSGRSTG

> GST-PLIED-L23(K32R) from pGEX-6P-2-PLIED-L23(K32R)

MSPILGYWKIKGLVQPTRLLEYLEEKYEEHLYERDEGDKWRNKKFELGLEFP  
NLPYYIDGDVKLTQSMAIIRYIADKHNMLGGCPKERAIEISMLEGAVLDIRYGVS  
IAYSKDFETLKVDFLSKLPEMLKMFEDRLCHKTYLNGDHVTHPDFMLYDALDV  
VLYMDPMCLDAFPKLVCFKKRIEAIQIDKYLKSSKYAWPLQGQWQATFGGGD  
HPPKSDLEVLFFQGPLGSMISLIAALAVDRVIGMENAMPWNGMRLRSGRSTGLP  
ADLAWFRNTLNKPVIMGRHTWESIGRPLPGRKNIILSSQPGTDDRVTWVKSV  
DEAIAACGDVPEIMVIGGGRVYEQFLPKAQKLYLTHIDAEVEGDTHFPDYEPDD  
WESVFSEFHDADAQNSHSYCFEILERR

> GST-PLIED-L36(K32R) from pGEX-6P-2-PLIED-L36(K32R)

MSPILGYWKIKGLVQPTRLLEYLEEKYEEHLYERDEGDKWRNKKFELGLEFP  
NLPYYIDGDVKLTQSMAIIRYIADKHNMLGGCPKERAIEISMLEGAVLDIRYGVS

IAYSKDFETLKVDFLSKLPEMLKMFEDRLCHKTYLNGDHVTHPDFMLYDALDV  
VLYMDPMCLDAFPKLVCFKKRIEAIQIDKYLKSSKYAWPLQGQWQATFGGGD  
HPPKSDLEVLFFQGPLGSMISLIAALAVDRVIGMENAMPWNLPADLAWFRRNTL  
GMRLRSGRSTGNKPVIMGRHTWESIGRPLPGRKNIILSSQPGTDDRVTWVKS  
VDEAIAACGDVPEIMVIGGGRVYEQFLPKAQKLYLTHIDAEVEGDTHFPDYEPD  
DWESVFSEFHDADAQNSHSYCFEILERR

> GST-PLIED-L51(K32R) from pGEX-6P-2-PLIED-L51(K32R)

MSPILGYWKIKGLVQPTRLLEYLEEKYEEHLYERDEGDKWRNKKFELGLEFP  
NLPYYIDGDVKLTQSMAIIRYIADKHNMLGGCPKERAIEISMLEGAVLDIRYGVS  
IAYSKDFETLKVDFLSKLPEMLKMFEDRLCHKTYLNGDHVTHPDFMLYDALDV  
VLYMDPMCLDAFPKLVCFKKRIEAIQIDKYLKSSKYAWPLQGQWQATFGGGD  
HPPKSDLEVLFFQGPLGSMISLIAALAVDRVIGMENAMPWNLPADLAWFRRNTL  
NKPVIMGRHTWESIGMRLRSGRSTGRPLPGRKNIILSSQPGTDDRVTWVKS  
VDEAIAACGDVPEIMVIGGGRVYEQFLPKAQKLYLTHIDAEVEGDTHFPDYEPD  
DWESVFSEFHDADAQNSHSYCFEILERR

> GST-PLIED-L52(K32R) from pGEX-6P-2-PLIED-LR52(K32R)

MSPILGYWKIKGLVQPTRLLEYLEEKYEEHLYERDEGDKWRNKKFELGLEFP  
NLPYYIDGDVKLTQSMAIIRYIADKHNMLGGCPKERAIEISMLEGAVLDIRYGVS  
IAYSKDFETLKVDFLSKLPEMLKMFEDRLCHKTYLNGDHVTHPDFMLYDALDV  
VLYMDPMCLDAFPKLVCFKKRIEAIQIDKYLKSSKYAWPLQGQWQATFGGGD  
HPPKSDLEVLFFQGPLGSMISLIAALAVDRVIGMENAMPWNLPADLAWFRRNTL  
NKPVIMGRHTWESIGRGMRLRSGRSTGPLPGRKNIILSSQPGTDDRVTWVKS  
VDEAIAACGDVPEIMVIGGGRVYEQFLPKAQKLYLTHIDAEVEGDTHFPDYEPD  
DWESVFSEFHDADAQNSHSYCFEILERR

> eDHFR(K32R)-FLAG from pcDNA5/TO-eDHFR(K32R)-FLAG

MISLIAALAVDRVIGMENAMPWNLPADLAWFRRNTLNKPVIMGRHTWESIGRP  
LPGRKNIILSSQPGTDDRVTWVKSVDIAAAGDVPEIMVIGGGRVYEQFLPKA  
QKLYLTHIDAEVEGDTHFPDYEPDDWESVFSEFHDADAQNSHSYCFEILERRG  
DYKDDDDK

> LANA-eDHFR(K32R) from pcDNA5/TO-LANA-eDHFR(K32R)

MGMRLRSGRSTGISLIAALAVDRVIGMENAMPWNLPADLAWFRRNTLNKPVIM  
GRHTWESIGRPLPGRKNIILSSQPGTDDRVTWVKSVDIAAAGDVPEIMVIG



GGRVYEQFLPKAQKLYLTHIDAEVEGDTHFPDYEPDDWESVFSEFHDADAQN  
SHSYCFEILERR

> eDHFR(K32R)-LANA from pcDNA5/TO-eDHFR(K32R)-LANA  
MISLIAALAVDRVIGMENAMPWNLPADLAWFRRNTLNKPVIMGRHTWESIGRP  
LPGRKNIILSSQPGTDDRVTWVKSVDIAACGDVPEIMVIGGGRVYEQFLPKA  
QKLYLTHIDAEVEGDTHFPDYEPDDWESVFSEFHDADAQN SHSYCFEILERRG  
MRLRSGRSTG

> PLIED-L23(K32R)-FLAG from pcDNA5/TO-PLIED-L23(K32R)-FLAG  
MISLIAALAVDRVIGMENAMPWNGMRLRSGRSTGLPADLAWFRRNTLNKPVIM  
GRHTWESIGRPLPGRKNIILSSQPGTDDRVTWVKSVDIAACGDVPEIMVIG  
GGRVYEQFLPKAQKLYLTHIDAEVEGDTHFPDYEPDDWESVFSEFHDADAQN  
SHSYCFEILERRGDYKDDDDK

> PLIED-L36(K32R)-FLAG from pcDNA5/TO-PLIED-L36(K32R)-FLAG  
MISLIAALAVDRVIGMENAMPWNLPADLAWFRRNTLGMRLRSGRSTGNKPVIM  
GRHTWESIGRPLPGRKNIILSSQPGTDDRVTWVKSVDIAACGDVPEIMVIG  
GGRVYEQFLPKAQKLYLTHIDAEVEGDTHFPDYEPDDWESVFSEFHDADAQN  
SHSYCFEILERRGDYKDDDDK

> PLIED-L51(K32R)-FLAG from pcDNA5/TO-PLIED-L51(K32R)-FLAG  
MISLIAALAVDRVIGMENAMPWNLPADLAWFRRNTLNKPVIMGRHTWESIGM  
RLRSGRSTGRPLPGRKNIILSSQPGTDDRVTWVKSVDIAACGDVPEIMVIG  
GGRVYEQFLPKAQKLYLTHIDAEVEGDTHFPDYEPDDWESVFSEFHDADAQN  
SHSYCFEILERRGDYKDDDDK

> PLIED-L52(K32R)-FLAG from pcDNA5/TO-PLIED-L52(K32R)-FLAG  
MISLIAALAVDRVIGMENAMPWNLPADLAWFRRNTLNKPVIMGRHTWESIGRG  
MRLRSGRSTGRLPGRKNIILSSQPGTDDRVTWVKSVDIAACGDVPEIMVIG  
GGRVYEQFLPKAQKLYLTHIDAEVEGDTHFPDYEPDDWESVFSEFHDADAQN  
SHSYCFEILERRGDYKDDDDK

### **Antibodies**

All antibodies used in this paper are listed in Table S7.

## References

- (1) Hamajima, W.; Fujimura, A.; Fujiwara, Y.; Yamatsugu, K.; Kawashima, S. A.; Kanai, M. Site-Selective Synthetic Acylation of a Target Protein in Living Cells Promoted by a Chemical Catalyst/Donor System. *ACS Chem Biol* **2019**, *14* (6), 1102-1109. DOI: 10.1021/acscchembio.9b00102.
- (2) Li, Z. Q.; Hao, P. L.; Li, L.; Tan, C. Y. J.; Cheng, X. M.; Chen, G. Y. J.; Sze, S. K.; Shen, H. M.; Yao, S. Q. Design and Synthesis of Minimalist Terminal Alkyne-Containing Diazirine Photo-Crosslinkers and Their Incorporation into Kinase Inhibitors for Cell- and Tissue-Based Proteome Profiling. *Angew Chem Int Edit* **2013**, *52* (33), 8551-8556. DOI: 10.1002/anie.201300683.
- (3) Adamson, C.; Kajino, H.; Kawashima, S. A.; Yamatsugu, K.; Kanai, M. Live-Cell Protein Modification by Boronate-Assisted Hydroxamic Acid Catalysis. *J Am Chem Soc* **2021**, *143* (37), 14976-14980. DOI: 10.1021/jacs.1c07060.
- (4) Fujiwara, Y.; Yamanashi, Y.; Fujimura, A.; Sato, Y.; Kujirai, T.; Kurumizaka, H.; Kimura, H.; Yamatsugu, K.; Kawashima, S. A.; Kanai, M. Live-cell epigenome manipulation by synthetic histone acetylation catalyst system. *Proc Natl Acad Sci U S A* **2021**, *118* (4). DOI: 10.1073/pnas.2019554118.
- (5) Shema-Yaacoby, E.; Nikolov, M.; Haj-Yahya, M.; Siman, P.; Allemand, E.; Yamaguchi, Y.; Muchardt, C.; Urlaub, H.; Brik, A.; Oren, M.; et al. Systematic identification of proteins binding to chromatin-embedded ubiquitylated H2B reveals recruitment of SWI/SNF to regulate transcription. *Cell Rep* **2013**, *4* (3), 601-608. DOI: 10.1016/j.celrep.2013.07.014. David, Y.; Vila-Perello, M.; Verma, S.; Muir, T. W. Chemical tagging and customizing of cellular chromatin states using ultrafast trans-splicing inteins. *Nat Chem* **2015**, *7* (5), 394-402. DOI: 10.1038/nchem.2224.

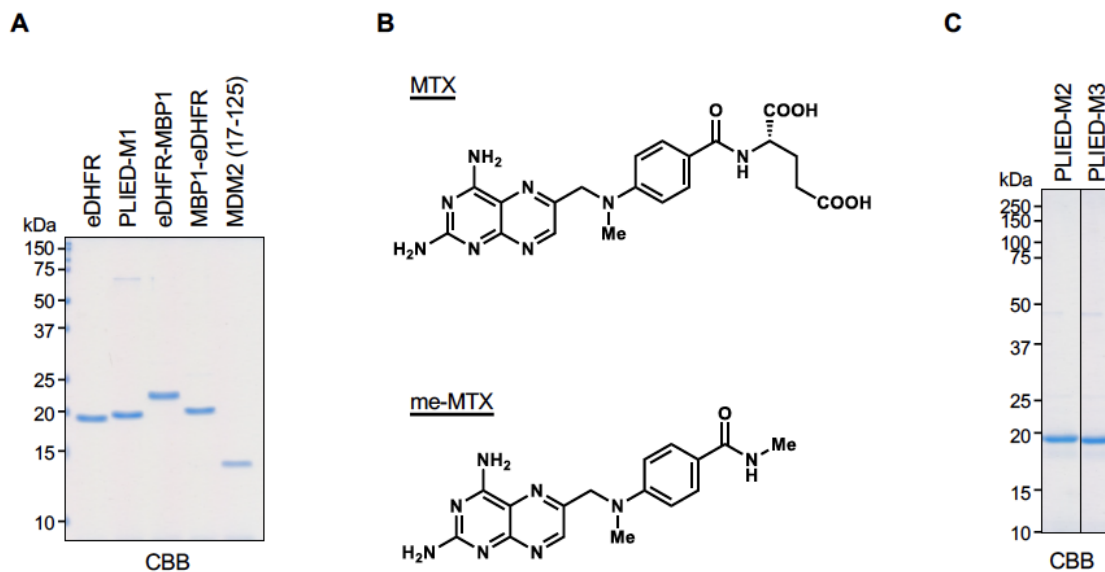

**Figure S1, related to Figure 2.**

**A**, Purified proteins of eDHFR derivatives used in Figure 2C. Purified eDHFR derivatives proteins were analyzed by SDS-PAGE and visualized by CBB staining. **B**, Chemical structure of MTX and me-MTX. **C**, Purified proteins of eDHFR derivatives used in Figure 2H. Purified PLIED proteins were analyzed as in **A**.

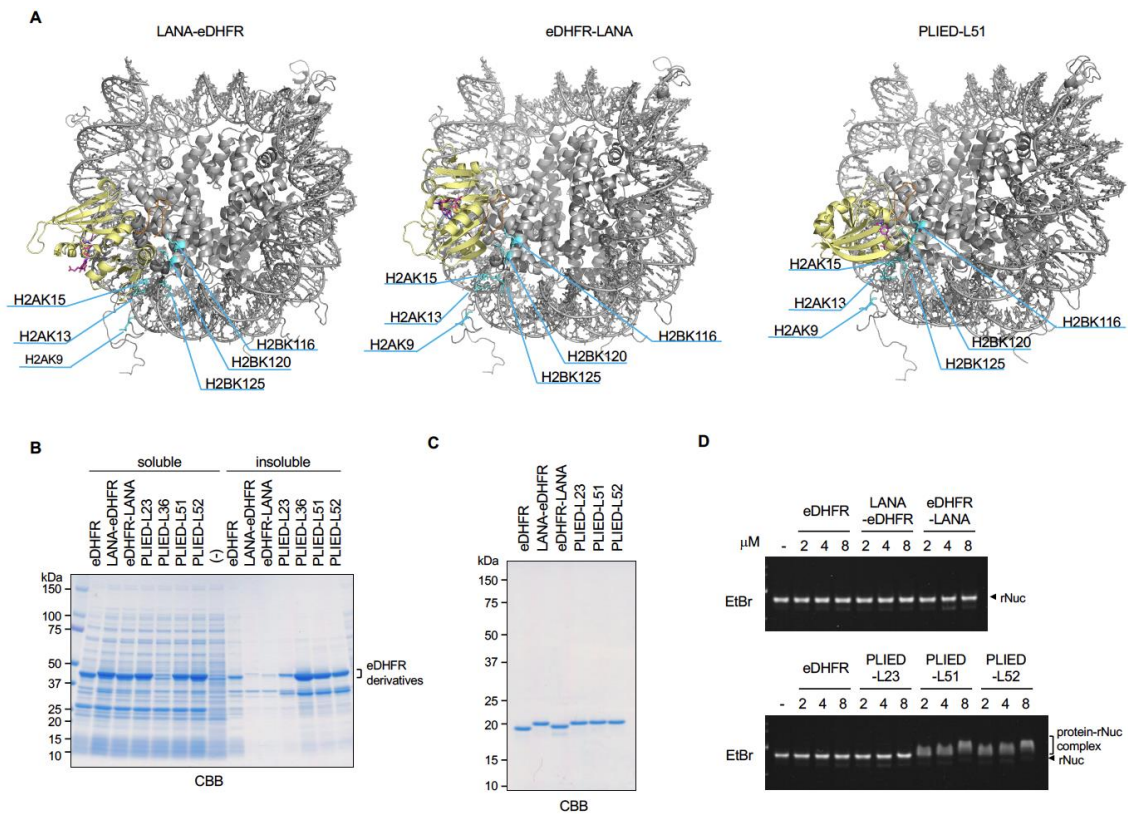

**Figure S2, related to Figure 3.**

**A**, Modelled structures of LANA-inserted eDHFR-nucleosome complex. The LANA (5-15) was implanted at the N-terminus (left), the C-terminus (middle), or between G51 and R52 (right) of eDHFR. eDHFR, LANA, MTX and lysines are shown in pale yellow, orange, magenta and cyan with labels, respectively. **B**, The eDHFR derivatives purification. The eDHFR derivatives-expressed *E. coli* BL21 C<sup>+</sup> cells were resuspended in solubilization buffer and sonicated. After centrifugation, the supernatant and the pellet were analyzed by SDS-PAGE as soluble and insoluble fractions, respectively, and proteins were visualized by CBB staining. **C**, Purified proteins of eDHFR derivatives. Purified proteins (50 μM) were analyzed by SDS-PAGE and visualized by CBB staining. **D**, Electrophoretic mobility shift assay of PLIED-bound nucleosomes. Recombinant nucleosomes (0.2 μM) were incubated with the indicated proteins (2, 4, and 8 μM). The samples were analyzed by 6% non-denaturing PAGE in 0.5× TBE buffer, and DNA was visualized by ethidium bromide (EtBr) staining. The positions of recombinant nucleosomes (rNuc) are shown. Representative data of two independent experiments are shown.

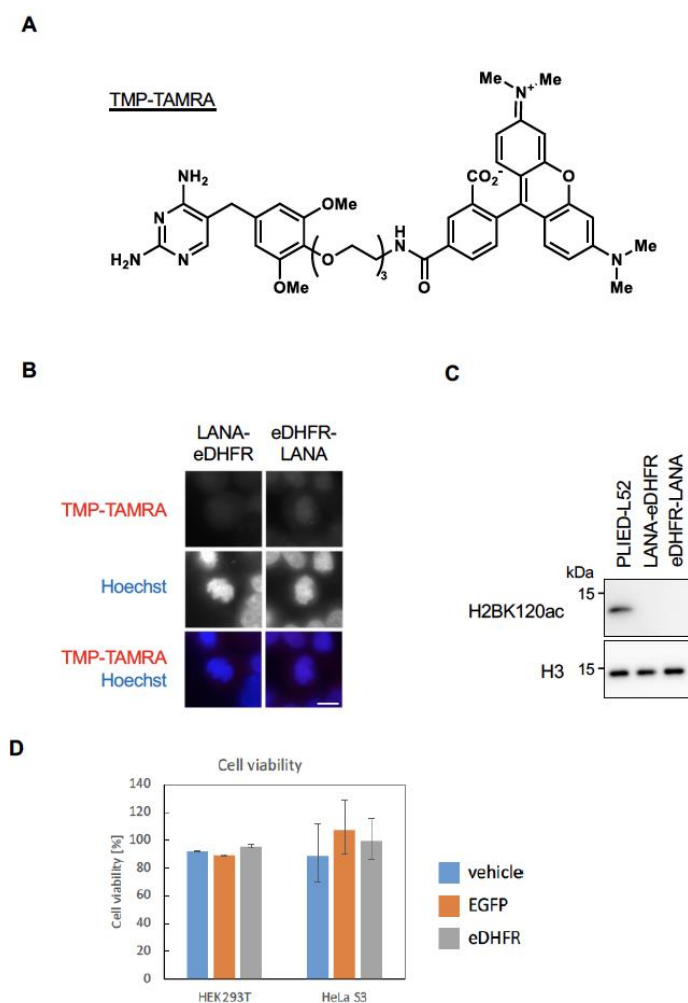

**Figure S3, related to Figure 4.**

**A**, Chemical structure of TMP-TAMRA. **B**, Subcellular localization of LANA-eDHFR or eDHFR-LANA. LANA-eDHFR- or eDHFR-LANA-transfected HEK293T cells were treated with nocodazole (330 nM) for 4 h, followed by TMP-TAMRA (10  $\mu$ M) with nocodazole for 1 h. DNA was stained with Hoechst 33342 to visualize chromatin distribution. Representative images of mitotic cells are shown. Scale bar, 10  $\mu$ m. **C**, In-cell histone acetylation by LANA-eDHFR or eDHFR-LANA. PLIED-L52-FLAG-, LANA-eDHFR-, or eDHFR-LANA-transfected HEK293T cells were incubated with acetyl donor **2** (100  $\mu$ M) and TMP-BAHA **1** (1  $\mu$ M) at 37  $^{\circ}$ C for 5 h. Whole-cell extracts were immunoblotted with anti-H2BK120ac antibody or anti-H3 antibody. Representative data of two independent experiments are shown. **D**, HEK293T or HeLaS3 cells were transfected with indicated plasmids at 37  $^{\circ}$ C for 34 h. After incubation, the cell viability was measured using CellTiter-Glo 2.0 and compared to non-transfected cells. The error bars represent the range of two independent experiments.

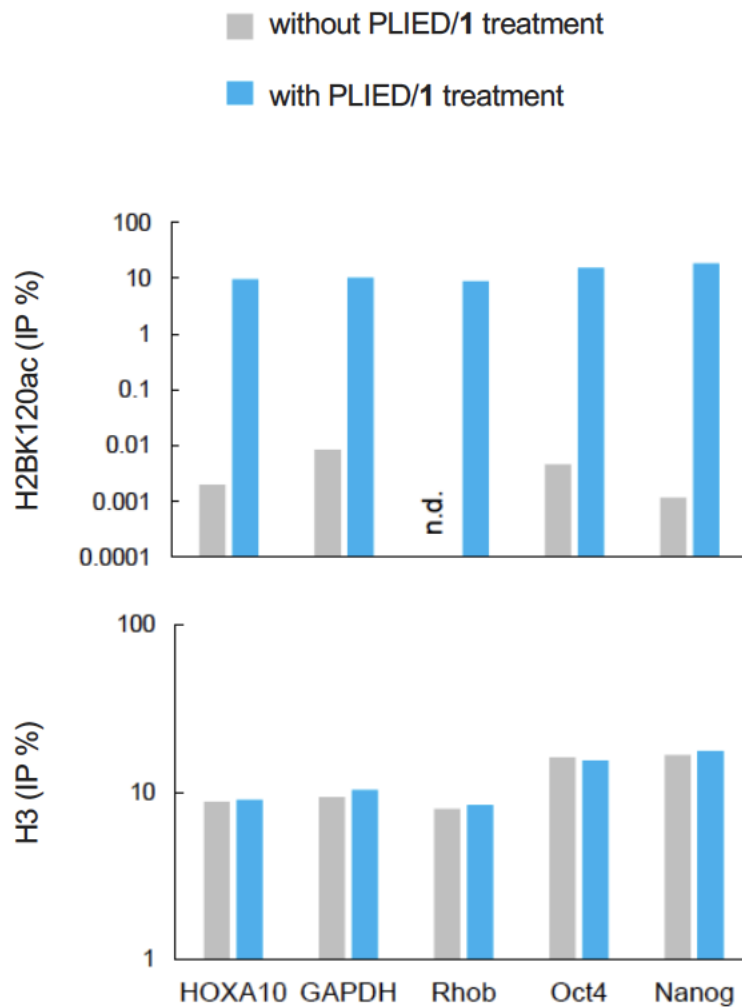

**Figure S4, related to Figure 4.**

Chromatin immunoprecipitation (ChIP) analysis of PLIED-L52-mediated histone acetylation. PLIED-L52-FLAG-transfected HEK293T cells were treated with TMP-BAHA **1** (5  $\mu$ M) and acetyl donor **2** (200  $\mu$ M) (blue bars) or **1** (5  $\mu$ M) only (gray bars) at 37  $^{\circ}$ C for 10 h, and were analyzed by ChIP assays using anti-H2BK120ac antibody and anti-H3 antibody. Immunoprecipitated DNA was assessed by real-time PCR using primers specific for indicated gene locus (see also Table S8). The IP (%) were calculated from the mean values of 3 PCRs from an experiment. “n.d.” denotes “not detected”.

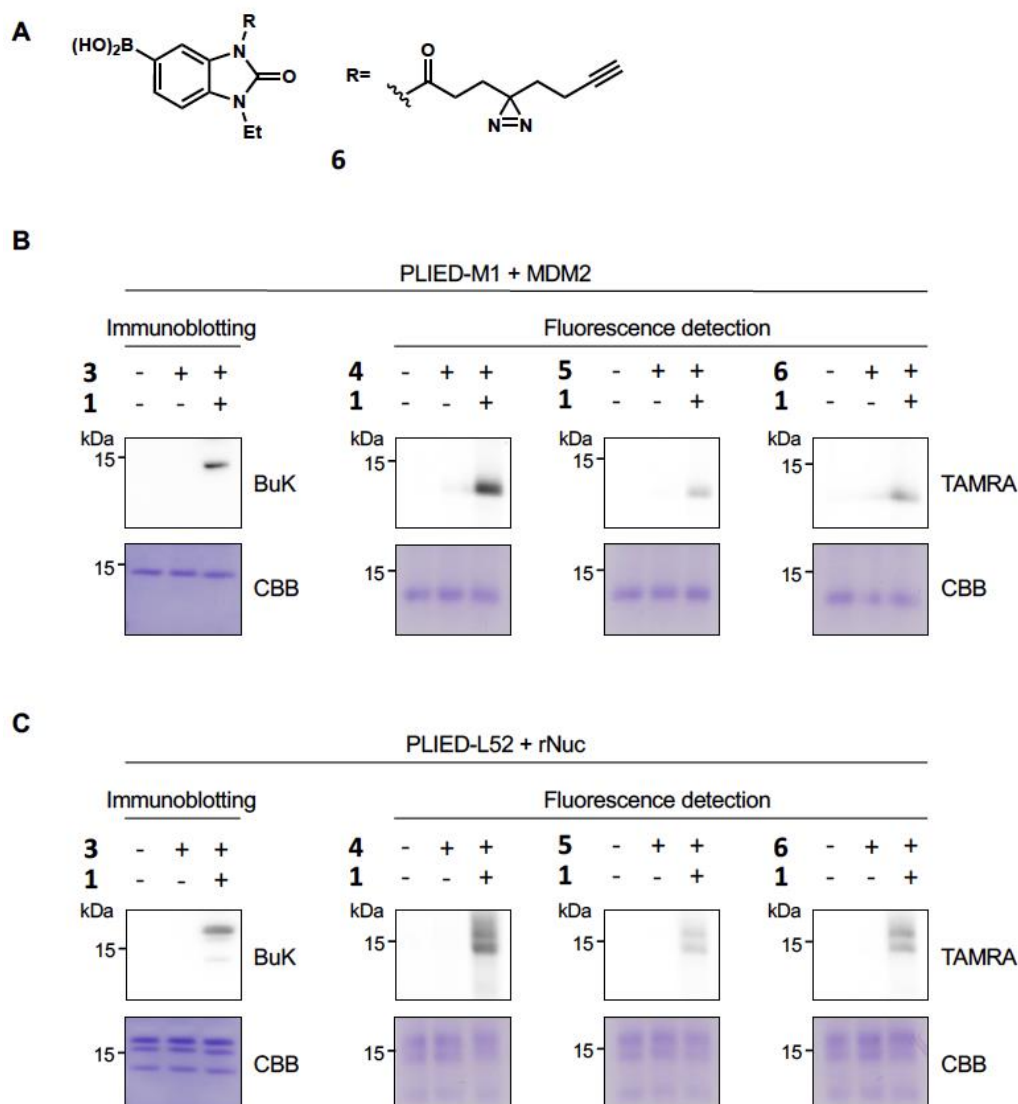

**Figure S5, related to Figure 5.**

**A**, Chemical structures of alkyne/diazirine donor **6**. **B**, Recombinant MDM2 (17–125, 1.4  $\mu\text{M}$ ) was incubated with PLIED-M1 in the presence or absence of TMP-BAHA **1** (10  $\mu\text{M}$ ) and acyl donor **3-6** (100  $\mu\text{M}$ ) at 37  $^{\circ}\text{C}$  for 5 h. **C**, Recombinant nucleosomes (0.35  $\mu\text{M}$ ) were incubated with PLIED-L52 protein (2  $\mu\text{M}$ ) in the presence or absence of TMP-BAHA **1** (5  $\mu\text{M}$ ) and acyl donor **3-6** (100  $\mu\text{M}$ ) at 37  $^{\circ}\text{C}$  for 5 h. The lysine butyrylation was detected by immunoblotting using anti-butyryl lysine (BuK) antibody. To detect acylation containing azide or alkyne, acylated lysines were labelled with TAMRA-alkyne or TAMRA-azide, respectively, by Cu(I)-catalyzed azide-alkyne cycloaddition reaction. The fluorescence detection is shown (TAMRA). MDM2 and histones were visualized by CBB staining.

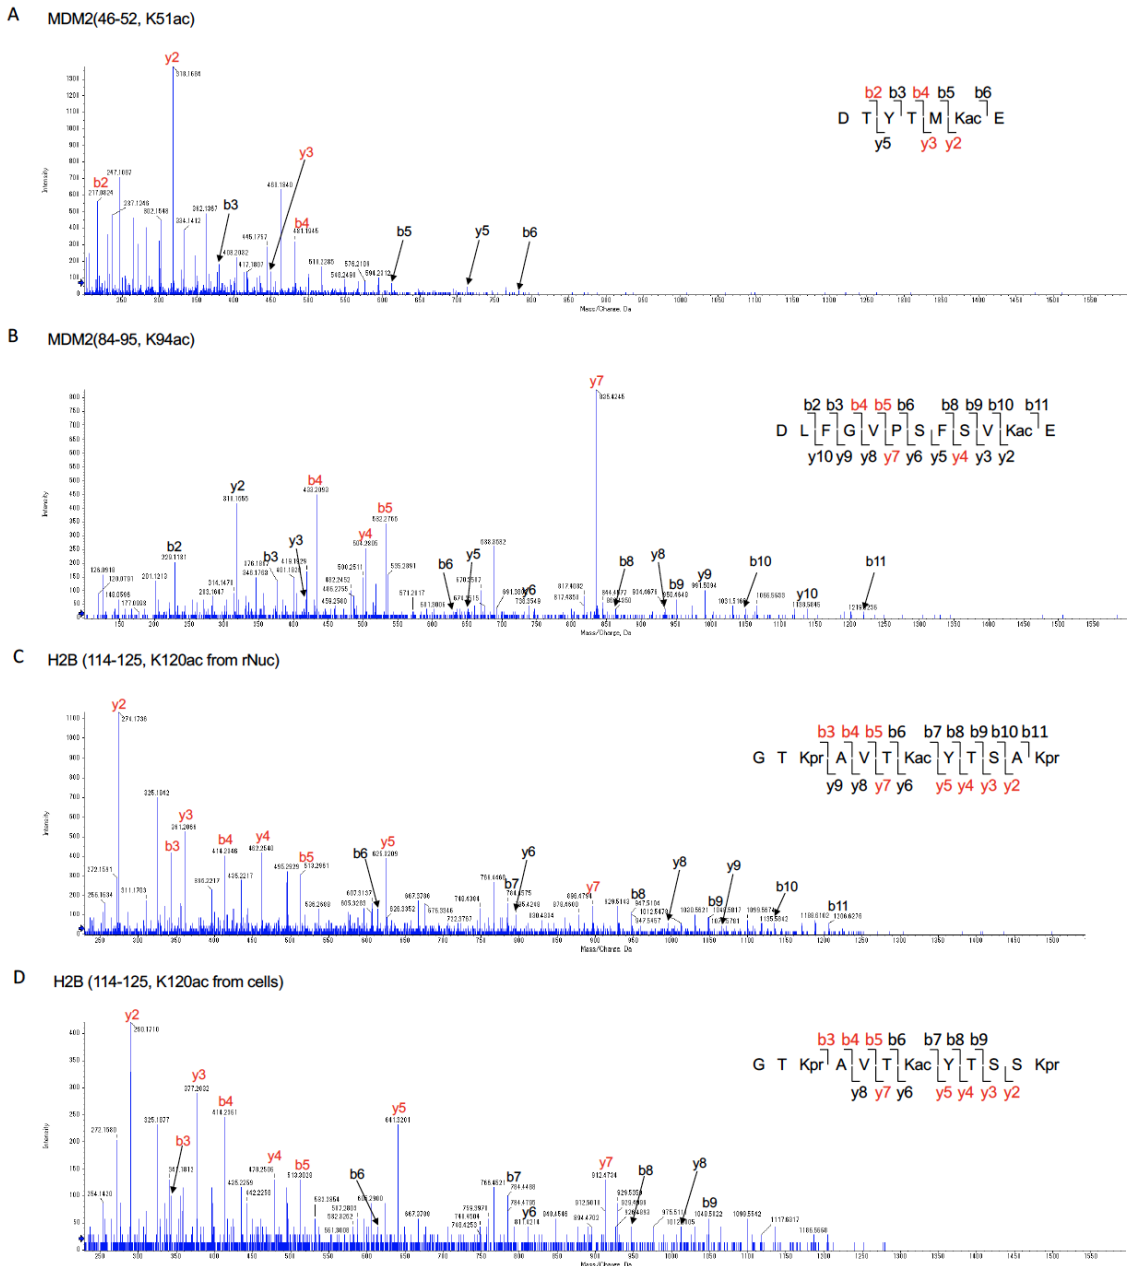

**Figure S6, related to Figure 2-4.**

Representative LC-MS/MS spectra for analysis of acetylation sites. MS/MS spectra of the precursor ions of acetylated peptides with  $m/z$  of 465.20 (MDM2 46-52 in Figure 2C; **A**), 683.85 (MDM2 84-95 in Figure 2H; **B**), 704.89 (H2B 114-125 from rNuc in Figure 3G; **C**), and 712.89 (H2B 114-125 from cells in Figure 4C; **D**) are shown. The b and y ions used for calculation of the percentage of lysine acetylation are colored in red.



**Table S1. Plasmids for protein expression.**

| plasmids                       | expressed protein     | expression system     |
|--------------------------------|-----------------------|-----------------------|
| pGEX-6P-2-hMDM2(17-125)        | GST-hMDM2(17-125)     | <i>E. Coli</i> BL21C+ |
| pGEX-6P-2-eDHFR(K32R)          | GST-eDHFR(K32R)       | <i>E. Coli</i> BL21C+ |
| pGEX-6P-2-eDHFR(K32R)-MBP1     | GST- eDHFR(K32R)-MBP1 | <i>E. Coli</i> BL21C+ |
| pGEX-6P-2-MBP1-eDHFR(K32R)     | GST- MBP1-eDHFR(K32R) | <i>E. Coli</i> BL21C+ |
| pGEX-6P-2-PLIED-M1(K32R)       | GST-PLIED-M1(K32R)    | <i>E. Coli</i> BL21C+ |
| pGEX-6P-2-PLIED-M2(K32R)       | GST-PLIED-M2(K32R)    | <i>E. Coli</i> BL21C+ |
| pGEX-6P-2-PLIED-M3(K32R)       | GST-PLIED-M3(K32R)    | <i>E. Coli</i> BL21C+ |
| pGEX-6P-2-LANA-eDHFR(K32R)     | GST-LANA-eDHFR(K32R)  | <i>E. Coli</i> BL21C+ |
| pGEX-6P-2-eDHFR(K32R)-LANA     | GST-eDHFR(K32R)-LANA  | <i>E. Coli</i> BL21C+ |
| pGEX-6P-2-PLIED-L23(K32R)      | GST-PLIED-L23(K32R)   | <i>E. Coli</i> BL21C+ |
| pGEX-6P-2-PLIED-L36(K32R)      | GST-PLIED-L36(K32R)   | <i>E. Coli</i> BL21C+ |
| pGEX-6P-2-PLIED-L51(K32R)      | GST-PLIED-L51(K32R)   | <i>E. Coli</i> BL21C+ |
| pGEX-6P-2-PLIED-52(K32R)       | GST-PLIED-L52(K32R)   | <i>E. Coli</i> BL21C+ |
| pcDNA5/TO-eDHFR(K32R)-FLAG     | eDHFR(K32R)-FLAG      | HEK293T               |
| pcDNA5/TO-LANA-eDHFR(K32R)     | LANA-eDHFR(K32R)      | HEK293T               |
| pcDNA5/TO-eDHFR(K32R)-LANA     | eDHFR(K32R)-LANA      | HEK293T               |
| pcDNA5/TO-PLIED-L23(K32R)-FLAG | PLIED-L23(K32R)-FLAG  | HEK293T               |
| pcDNA5/TO-PLIED-L36(K32R)-FLAG | PLIED-L36(K32R)-FLAG  | HEK293T               |
| pcDNA5/TO-PLIED-L51(K32R)-FLAG | PLIED-L51(K32R)-FLAG  | HEK293T               |
| pcDNA5/TO-PLIED-L52(K32R)-FLAG | PLIED-L52(K32R)-FLAG  | HEK293T, HeLaS3       |

**Table S2. LC-MS/MS parameters for MDM2.**

| peptide | sequence             | digestion   | precuesor<br>( <i>m/z</i> ) <sup>a</sup> | ion | fragment ions  | collision<br>energy<br>(V) | retention<br>time (min) |
|---------|----------------------|-------------|------------------------------------------|-----|----------------|----------------------------|-------------------------|
| 46-52   | DTYTMKE              | Glu-C/Asp-N | 472.21 (1Pr)<br>465.20 (1Ac)             |     | b2, b4, y2, y3 | 35                         | 3.9-5.5                 |
| 53-67   | VLFYLGQYIMTKRLY      | Glu-C/Asp-N | 655.36 (1Pr)<br>650.69 (1Ac)             |     | y5, y6, y7, y8 | 35                         | 7.3-8.6                 |
| 84-95   | DLFQVPSFSVKE         | Glu-C/Asp-N | 690.86 (1Pr)<br>683.85 (1Ac)             |     | b4, b5, y4, y7 | 35                         | 7.1-8.4                 |
| 96-114  | HRKIYTMIIYRNLVVVNQQE | Glu-C/Asp-N | 820.78 (1Pr)<br>816.11 (1Ac)             |     | y4, y5, y6, y7 | 35                         | 5.3-6.5                 |

<sup>a</sup> *nAc mPr* in parenthesis indicates *n* lysines acetylated out of all (*n+m*) lysines on the corresponding peptide.

**Table S3. LC–MS/MS parameters for histone H2A.**

| peptide | sequence                   | digestion     | precuesor ion<br>( <i>m/z</i> ) <sup>a</sup>                         | fragment ions                | collision<br>energy (V) | retention time<br>(min) |
|---------|----------------------------|---------------|----------------------------------------------------------------------|------------------------------|-------------------------|-------------------------|
| 4-11    | GKQGGKAR                   | trypsin       | 457.26 (2Pr)<br>450.26 (1Pr 1Ac)<br>443.25 (2Ac)                     | y4, y5, y6                   | 35                      | 2.0-3.6                 |
| 12-17   | AKAKTR                     | trypsin       | 393.75 (2Pr)<br>386.74 (1Pr 1Ac)<br>379.73 (2Ac)                     | b2, b3, y3, y4               | 35                      | 1.7-3.6                 |
| 36-42   | KGNYSER                    | trypsin       | 455.22 (1Pr)<br>448.22 (1Ac)                                         | y5, y6, y7, y8               | 35                      | 2.7-3.4                 |
| 72-77   | DNKKTR                     | trypsin       | 437.24 (2Pr)<br>430.24 (1Pr 1Ac)<br>423.23 (2Ac)                     | b3, y3                       | 35                      | 2.8-3.6                 |
| 93-99   | LNKLLGR                    | trypsin/Glu-C | 435.28 (1Pr)<br>428.27 (1Ac)                                         | y3, y4, y5, y6               | 35                      | 4.1-4.7                 |
| 100-121 | VTIAQGGVLPNI<br>QAVLLPKKTE | trypsin/Glu-C | 801.14 (2Pr)<br>796.47 (1Pr 1Ac)<br>791.80 (2Ac)                     | y5, y6, y7, y9               | 35                      | 7.2-7.7                 |
| 122-129 | SHHKAKGK                   | trypsin/Glu-C | 530.80 (3Pr)<br>523.79 (2Pr 1Ac)<br>516.78 (1Pr 2Ac)<br>509.78 (3Ac) | b4, b5, y3, y4<br>b6, b7, y2 | 35                      | 2.5-3.7                 |

<sup>a</sup> *nAc mPr* in parenthesis indicats *n* lysines acetylated out of all (*n+m*) lysines on the corresponding peptide.

**Table S4. LC-MS/MS parameters for histone H2B.**

| peptide           | sequence          | digestion     | precuesor ion<br>( <i>m/z</i> ) <sup>a</sup>                         | fragment ions                    | collision<br>energy<br>(V) | retention<br>time (min) |
|-------------------|-------------------|---------------|----------------------------------------------------------------------|----------------------------------|----------------------------|-------------------------|
| 25-29             | DGKKR             | trypsin/Asp-N | 358.21 (2Pr)<br>351.20 (1Pr 1Ac)<br>344.19 (2Ac)                     | b3, y2                           | 35                         | 3.3-3.4                 |
| 34-50             | KESYSIYVYKVLKQVHP | trypsin/Asp-N | 750.41 (3Pr)<br>745.74 (2Pr 1Ac)<br>741.07 (1Pr 2Ac)<br>736.40 (3Ac) | b8, y8, y9<br>y5, y6, y7         | 35                         | 7.7-7.9                 |
| 51-67             | DTGISSKAMGIMNSFVN | trypsin/Asp-N | 914.43 (1Pr)<br>907.43 (1Ac)                                         | b8, b9, b11, y6, y8              | 35                         | 7.1-7.3                 |
| 80-86             | LAHYNKR           | trypsin       | 479.27 (1Pr)<br>472.26 (1Ac)                                         | y3, y4, y5, y6                   | 35                         | 2.5-2.8                 |
| 106-113           | LAKHAVSE          | trypsin/Glu-C | 455.75 (1Pr)<br>448.75 (1Ac)                                         | b3, b4, b5, b6                   | 35                         | 2.8-3.3                 |
| 114-125<br>(rNuc) | GTKAVTKYTSK       | trypsin/Glu-C | 711.90 (3Pr)<br>704.89 (2Pr 1Ac)<br>697.88 (1Pr 2Ac)<br>690.87 (3Ac) | b3, b4, b5, y7<br>y2, y3, y4, y5 | 40                         | 4.2-5.9                 |
| 114-125<br>(cell) | GTKAVTKYTSSK      | trypsin/Glu-C | 719.89 (3Pr)<br>712.89 (2Pr 1Ac)<br>705.88 (1Pr 2Ac)<br>698.87 (3Ac) | b3, b4, b5, y7<br>y2, y3, y4, y5 | 40                         | 4.1-5.5                 |

<sup>a</sup> *nAc mPr* in parenthesis indicats *n* lysines acetylated out of all (*n+m*) lysines on the corresponding peptide.

**Table S5. LC–MS/MS parameters for histone H3.**

| peptide | sequence       | digestion | precuesor ion<br>( <i>m/z</i> ) <sup>a</sup>                         | fragment ions                                                                       | collision<br>energy (V) | retention<br>time (min) |
|---------|----------------|-----------|----------------------------------------------------------------------|-------------------------------------------------------------------------------------|-------------------------|-------------------------|
| 3-8     | TKQTAR         | trypsin   | 380.72 (1Pr)<br>373.71 (1Ac)                                         | y <sub>2</sub> , y <sub>3</sub> , y <sub>4</sub> , y <sub>5</sub>                   | 35                      | 1.6-3.0                 |
| 9-17    | KSTGGKAPR      | trypsin   | 507.29 (2Pr)<br>500.28 (1Pr 1Ac)<br>493.27 (2Ac)                     | y <sub>5</sub> , y <sub>6</sub> , y <sub>7</sub> , y <sub>8</sub>                   | 35                      | 2.6-3.1                 |
| 18-26   | KQLATKAAR      | trypsin   | 549.84 (2Pr)<br>542.83 (1Pr 1Ac)<br>535.82 (2Ac)                     | y <sub>5</sub> , y <sub>6</sub> , y <sub>7</sub> , y <sub>8</sub>                   | 35                      | 3.5-4.6                 |
| 27-40   | KSAPATGGVKKPHR | trypsin   | 534.64 (3Pr)<br>529.97 (2Pr 1Ac)<br>525.30 (1Pr 2Ac)<br>520.63 (3Ac) | y <sub>5</sub> , y <sub>6</sub> , y <sub>7</sub> , y <sub>8</sub><br>y <sub>4</sub> | 35                      | 3.4-4.1                 |
| 54-63   | YQKSTELLIR     | trypsin   | 653.87 (1Pr)<br>646.86 (1Ac)                                         | b <sub>3</sub> , y <sub>6</sub> , y <sub>7</sub> , y <sub>8</sub>                   | 35                      | 4.7-5.3                 |
| 64-69   | KLPFQR         | trypsin   | 422.76 (1Pr)<br>415.75 (1Ac)                                         | y <sub>2</sub> , y <sub>3</sub> , y <sub>4</sub> , y <sub>5</sub>                   | 35                      | 4.2-4.9                 |
| 73-83   | EIAQDFKTDLR    | trypsin   | 696.36 (1Pr)<br>689.35 (1Ac)                                         | y <sub>5</sub> , y <sub>6</sub> , y <sub>7</sub> , y <sub>8</sub>                   | 35                      | 4.9-6.0                 |
| 117-128 | VTIMPKDIQLAR   | trypsin   | 720.92 (1Pr)<br>713.91 (1Ac)                                         | b <sub>3</sub> , y <sub>8</sub> , y <sub>9</sub> , y <sub>10</sub>                  | 35                      | 5.1-5.8                 |

<sup>a</sup> *nAc mPr* in parenthesis indicats *n* lysines acetylated out of all (*n+m*) lysines on the corresponding peptide.

**Table S6. LC–MS/MS parameters for histone H4.**

| peptide | sequence       | digestion | precuesor ion<br>( <i>m/z</i> ) <sup>a</sup>                                             | fragment ions                                                                                                                                            | collision<br>energy (V) | retention time<br>(min) |
|---------|----------------|-----------|------------------------------------------------------------------------------------------|----------------------------------------------------------------------------------------------------------------------------------------------------------|-------------------------|-------------------------|
| 4-17    | GKGGKGLGKGGAKR | trypsin   | 747.94 (4Pr)<br>740.93 (3Pr 1Ac)<br>733.93 (2Pr 2Ac)<br>726.92 (1Pr 3Ac)<br>719.91 (4Ac) | y <sub>3</sub> , y <sub>4</sub> , y <sub>5</sub><br>b <sub>2</sub> , b <sub>3</sub> , b <sub>4</sub><br>y <sub>7</sub> , y <sub>8</sub> , y <sub>9</sub> | 45                      | 3.8-5.1                 |
| 20-23   | KVLR           | trypsin   | 286.20 (1Pr)<br>279.19 (1Ac)                                                             | y <sub>2</sub> , y <sub>3</sub>                                                                                                                          | 35                      | 3.0-4.0                 |
| 24-35   | DNIQGITKPAIR   | trypsin   | 691.39 (1Pr)<br>684.39 (1Ac)                                                             | y <sub>6</sub> , y <sub>7</sub> , y <sub>8</sub> , y <sub>9</sub>                                                                                        | 40                      | 4.3-4.8                 |
| 41-45   | GGVKR          | trypsin   | 286.68 (1Pr)<br>279.67 (1Ac)                                                             | y <sub>2</sub> , y <sub>3</sub>                                                                                                                          | 35                      | 2.3-3.0                 |
| 56-67   | GVLKVFLENVIR   | trypsin   | 721.94 (1Pr)<br>714.93 (1Ac)                                                             | y <sub>6</sub> , y <sub>7</sub> , y <sub>8</sub> , y <sub>9</sub>                                                                                        | 40                      | 7.3-7.8                 |
| 68-78   | DAVTYTEHAKR    | trypsin   | 673.84 (1Pr)<br>666.83 (1Ac)                                                             | y <sub>5</sub> , y <sub>6</sub> , y <sub>7</sub> , y <sub>8</sub>                                                                                        | 45                      | 3.0-4.3                 |
| 79-92   | KTVTAMDVVYALKR | trypsin   | 853.98 (2Pr)<br>846.97 (1Pr 1Ac)<br>839.96 (2Ac)                                         | y <sub>8</sub> , y <sub>9</sub> , y <sub>10</sub> , y <sub>11</sub>                                                                                      | 40                      | 6.4-6.8                 |

<sup>a</sup> *nAc mPr* in parenthesis indicats *n* lysines acetylated out of all (*n+m*) lysines on the corresponding peptide.

**Table S7. Antibodies for western blotting or ChIP assay<sup>4</sup>.**

| antibodies          | source                    | identifier |
|---------------------|---------------------------|------------|
| Anti-acetyl lysine  | cell signaling technology | 9441       |
| Anti-H2BK120ac      | ref. 2                    | N/A        |
| Anti-butyryl lysine | PTM Biolabs               | PTM-301    |
| Anti-RNF20          | Novus                     | NB100-2242 |
| Anti-b-actin        | sigma                     | A5316      |
| Anti-H2BK120ub      | cell signaling technology | 5546       |
| Anti-H3K79me2       | abcam                     | ab3594     |
| Anti-H3K9ac         | millipore                 | 07-352     |
| Anti-H3K18ac        | abcam                     | ab1191     |
| Anti-H3             | abcam                     | ab1791     |
| Normal rabbit IgG   | cell signaling technology | 2729       |
| Normal mouse IgG    | SantaCruz                 | sc-2025    |

**Table S8. Primers for real-time PCR<sup>5</sup>.**

| primers   | sequene (5'-3')      | reference |
|-----------|----------------------|-----------|
| HOXA10-fw | TGGACCAATGATGCCCTTCT | 5         |
| HOXA10-rv | CCTGATTGCCCAAGACTCGA |           |
| GAPDH-fw  | CCGGGAGAAGCTGAGTCATG | 5         |
| GAPDH-rv  | TTTGCGGTGGAAATGTCCTT |           |
| Rhob-fw   | CCTGGTGGCCAACAAAAAAG | 5         |
| Rhob-rv   | TCTGTGCGGACATGCTCGT  |           |
| Oct4-fw   | GTGGAGGAAGCTGACAACAA | 5         |
| Oct4-rv   | ATTCTCCAAGTTGCCTCTCA |           |
| Nanog-fw  | CAAAGGCAAACAACCCACTT | 5         |
| Nanog-rv  | TCTGCTGGAGGCTGAGGTAT |           |
